# Supplementary material for: Severe Dengue Epidemic, Sri Lanka, 2017
Source: PubMed Central journal article supplement (PMC7101108; doi:10.3201/eid2604.190435), 2020-04
Supplement: 19-0435-Techapp-s1.pdf [file 19-0435-Techapp-s1.pdf]

# Severe Dengue Epidemic, Sri Lanka, 2017

## Appendix

### Supplementary Methods

#### Viral Isolation and Sequencing from Blood Samples

Virus culture was done by inoculating 15  $\mu$ L of PCR-positive samples and 185  $\mu$ L GIBCO Dulbecco's Modified Eagle Medium: Nutrient Mixture F-12 (DMEM-F-12) supplemented with sodium bicarbonate containing 2% fetal bovine serum (FBS) on C6/36 mosquito cells at 37°C and 5% CO<sub>2</sub>. Viral RNA was isolated from C6/36 culture supernatants using QIAamp Viral RNA Mini Kit from Qiagen using manufacturer's protocol. Complementary DNA (cDNA) was made using isolated RNA as a template and SuperScript® III Reverse transcription from Invitrogen. cDNA was amplified by using NEB Phusion High Fidelity kit and primers spanning precursor membrane (prM) and envelope (E) proteins. The final product was isolated by gel electrophoresis and sequenced by Sanger technique.

**Appendix Table.** Age-specific dengue incidence by province, Sri Lanka\*

| Province      | Age-specific incidence per 100,000 population |          |          |          |          |         |          |          |          |          |         |        |
|---------------|-----------------------------------------------|----------|----------|----------|----------|---------|----------|----------|----------|----------|---------|--------|
|               | 0-4 y                                         | 5-9 y    | 10-14 y  | 15-19 y  | 20-24 y  | 25-29 y | 30-34 y  | 35-39 y  | 40-44 y  | 44-49 y  | 50-64 y | >65 y  |
| Western       | 1,050.58                                      | 1,742.60 | 2,181.65 | 2,011.07 | 1,896.41 | 1401.98 | 1,562.64 | 1,247.91 | 1,137.35 | 1,029.01 | 994.95  | 849.80 |
| Eastern       | 807.18                                        | 1,332.27 | 1,285.31 | 1,143.92 | 705.01   | 512.37  | 516.14   | 390.49   | 320.15   | 148.27   | 280.80  | 160.95 |
| Sabaraga-muwa | 245.22                                        | 366.83   | 644.99   | 889.44   | 1,107.81 | 949.64  | 1,159.29 | 962.81   | 958.22   | 854.35   | 904.92  | 714.39 |
| Northern      | 327.35                                        | 496.99   | 542.26   | 877.08   | 843.38   | 552.60  | 510.08   | 400.41   | 285.90   | 172.67   | 260.59  | 240.18 |
| Central       | 303.90                                        | 591.12   | 999.58   | 1,262.67 | 893.26   | 671.94  | 724.10   | 613.29   | 587.65   | 564.96   | 522.86  | 366.98 |
| Southern      | 178.39                                        | 269.14   | 461.82   | 724.48   | 994.49   | 702.40  | 723.89   | 614.68   | 562.29   | 467.06   | 551.51  | 380.82 |
| North Western | 291.63                                        | 486.48   | 632.97   | 690.28   | 636.56   | 497.07  | 564.06   | 496.52   | 440.14   | 378.89   | 444.78  | 302.17 |
| Uva           | 56.65                                         | 120.35   | 166.88   | 308.57   | 308.01   | 231.03  | 208.88   | 177.74   | 164.36   | 93.92    | 149.93  | 95.77  |
| North Central | 23.38                                         | 30.54    | 66.18    | 217.98   | 391.58   | 318.48  | 333.14   | 269.94   | 237.15   | 233.63   | 160.05  | 76.96  |
| Total         | 500.76                                        | 833.17   | 1,080.28 | 1,151.98 | 1,094.62 | 819.80  | 899.87   | 735.29   | 672.90   | 586.71   | 608.32  | 472.82 |

\*Source: sentinel site surveillance
